# Supplementary figures and images for: Children and youth perceive smoking messages in an unbranded advertisement from a NIKE marketing campaign: a cluster randomised controlled trial
Source: Springer Nature journal article supplement (doi:10.1186/1471-2431-11-26), 2011-04-08

Exposure ad

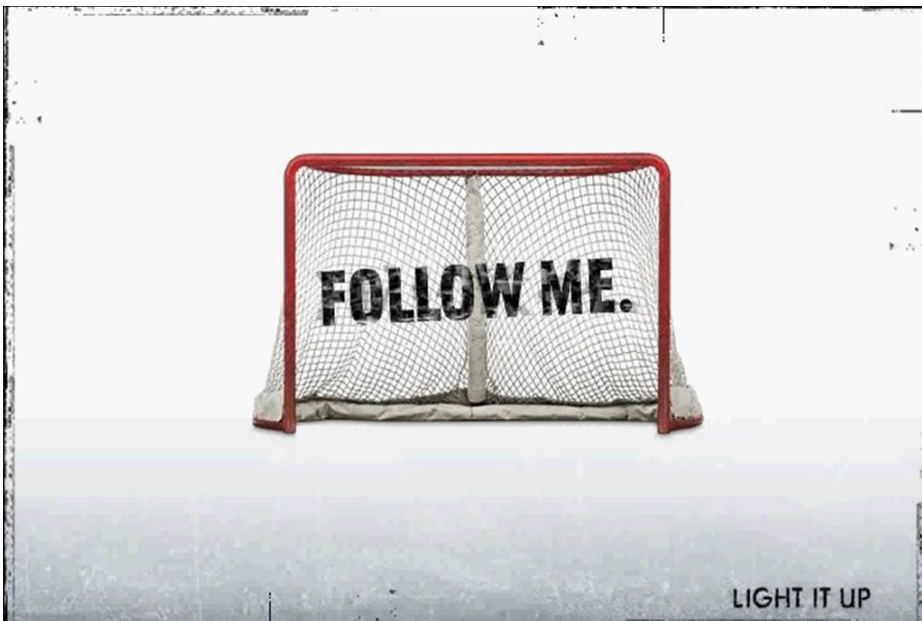

Neutral (control) ad

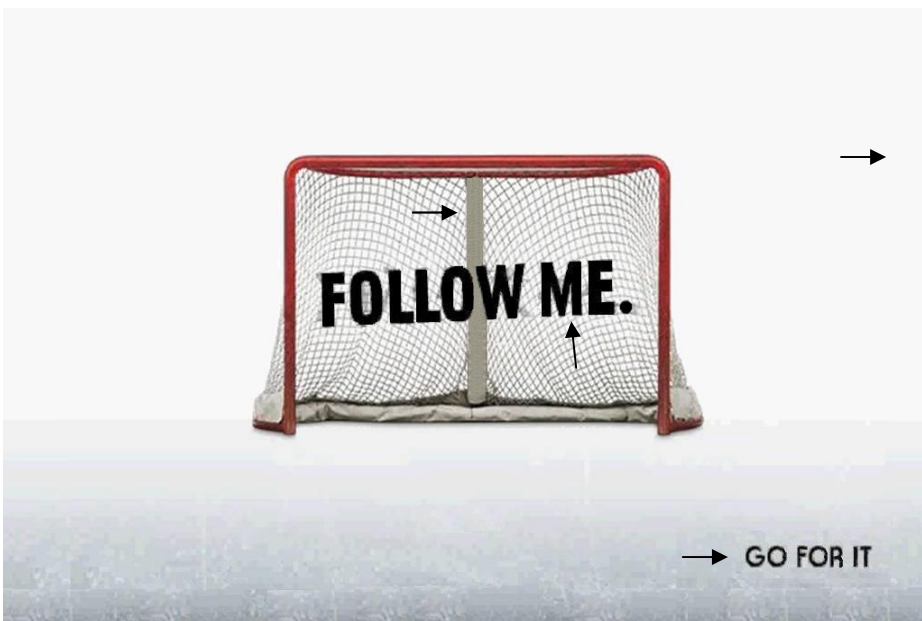

Supplement: 12887_2010_440_MOESM2_ESM.pdf [file 12887_2010_440_MOESM2_ESM.pdf]
